# Supplementary material
Source: PubMed Central journal article supplement (PMC2838338)
Supplement: supp_M109.051938_jbc.M109.051938-1.pdf [file supp_M109.051938_jbc.M109.051938-1.pdf]

## SUPPLEMENTAL FIGURES

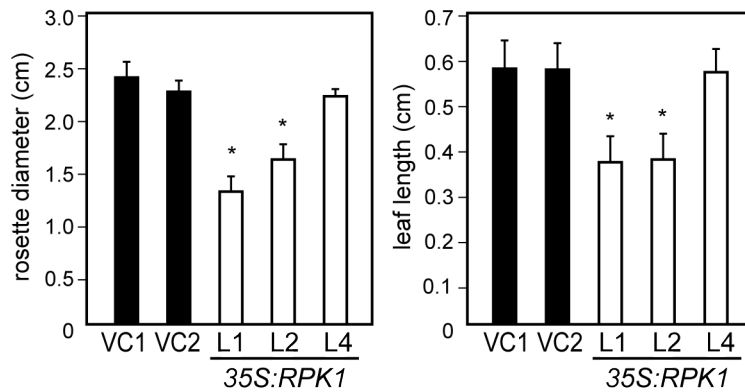

Supplemental Figure 1. Rosette sizes and leaf lengths of *35S:RPK1* grown on GM-agar for 2-weeks. Similar results were obtained 5 times independent experiments. Values are means  $\pm$ SD of 20 measurements. Student's *t* test; \* $P < 0.0005$ .

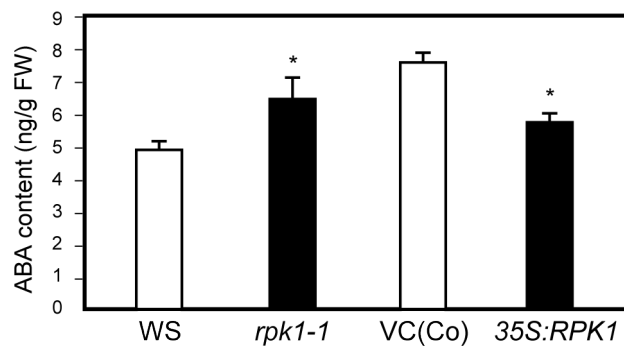

Supplemental Figure 2. ABA contents (ng/g fresh weight) in the leaves of WS, *rpkl-1*, *35S:RPK1* L2, and the control plants (vector control: VC) grown on soil pots for 5-weeks. Values are means  $\pm$ SD of three independent replicates of leaves pooled from five independent plants. Student's *t* test; \* $P < 0.05$ , \*\* $P < 0.001$ .

Supplemental Table 1. Primer pairs used in quantitative real-time PCR

| Gene     |           | Forward primer             | Reverse primer        |
|----------|-----------|----------------------------|-----------------------|
| RPK1     | At1g69270 | actggtgtggctggaacatt       | cgagactcggcatgtcatt   |
| rd29a    | At5g52310 | tggatctgaagaacgaatctgatatc | ggtctcccttcgccagaa    |
| cor15a   | At2g42540 | cagttcgtcgtcgtttctca       | cgcagctttctcagcttctt  |
| kin2     | At5g15970 | aaggccaaggatgctgct         | actgccgatccgatatact   |
| AtrbohD  | AT5g47910 | aactctccgctgattccaac       | tcattcctaagcattcccaaa |
| FRK      | At2g19190 | tgagactccttacgatgcactt     | gaagtttcccgttttgctg   |
| AtGLR2.7 | At2g29120 | agatagctagggatatcgggatg    | gcgctattccattggtcatt  |
| 18SrRNA  |           | cctacggaaacctgttacga       | cgcgagaagtccactaaacc  |

Supplementary Table 2. The upregulated genes in the microarray analysis of 35S:RPK1 plants with fold change of &gt;2 (35SRPK1/wild-type control).

| Locus       | Gene name                                                                                | Fold change*  |      | P value    |            |            |            |
|-------------|------------------------------------------------------------------------------------------|---------------|------|------------|------------|------------|------------|
|             |                                                                                          | Average Ratio | S.D. | lineL1 cy3 | lineL1 cy5 | lineL2 cy3 | lineL2 cy5 |
| At1g69270.1 | leucine-rich repeat family protein                                                       | 12.2          | 4    | 8.82E-31   | 6.45E-32   | 6.09E-28   | 1.18E-28   |
| At2g42540.1 | cold-responsive protein / cold-regulated protein (cor15a)                                | 5.4           | 3.5  | 6.26E-09   | 2.81E-11   | 4.21E-27   | 1.04E-27   |
| At5g50200.1 | expressed protein similar to unknown protein                                             | 5.2           | 4.2  | 3.13E-27   | 1.26E-28   | 6.77E-04   | 5.93E-04   |
| At2g43620.1 | chitinase, putative similar to basic endochitinase CHB4 precursor                        | 5.1           | 3.1  | 9.71E-27   | 5.77E-27   | 8.18E-09   | 6.51E-08   |
| At1g25560.1 | AP2 domain-containing transcription factor, putative similar to DNA-binding protein RAV2 | 4.4           | 1.0  | 7.67E-22   | 5.19E-24   | 2.81E-17   | 2.02E-19   |
| At5g39670.1 | calcium-binding EF hand family protein                                                   | 4.2           | 2.3  | 3.70E-25   | 1.69E-24   | 1.84E-09   | 9.67E-09   |
| At2g20142.1 | expressed protein                                                                        | 4.2           | 2.0  | 9.59E-23   | 2.02E-24   | 7.91E-09   | 4.22E-09   |
| At1g09350.1 | galactinol synthase, glycosyl transferase family 8                                       | 4.0           | 1.7  | 2.73E-10   | 1.22E-09   | 5.48E-22   | 5.90E-19   |
| At1g13260.1 | DNA-binding protein RAV1 (RAV1)                                                          | 3.9           | 1.0  | 5.78E-20   | 6.33E-23   | 5.71E-14   | 8.25E-18   |
| At1g68840.1 | DNA-binding protein RAV2 (RAV2) / AP2 domain-containing protein RAP2.8                   | 3.9           | 0.4  | 9.17E-19   | 3.12E-21   | 1.54E-17   | 3.12E-19   |
| At4g23810.1 | WRKY family transcription factor AR411                                                   | 3.9           | 0.3  | 2.28E-17   | 1.63E-18   | 2.10E-19   | 5.33E-20   |
| At1g75900.1 | family II extracellular lipase 3 (EXL3) EXL3                                             | 3.8           | 0.7  | 5.99E-12   | 5.99E-12   | 1.15E-17   | 3.80E-18   |
| At3g09440.1 | heat shock cognate 70 kDa protein 3 (HSC70-3) (HSP70-3)                                  | 3.7           | 1.2  | 3.38E-22   | 4.77E-22   | 3.13E-13   | 4.37E-13   |
| At2g17040.1 | no apical meristem (NAM) family protein contains                                         | 3.6           | 0.5  | 1.54E-15   | 1.25E-16   | 1.02E-19   | 3.41E-19   |
| At1g64400.1 | long-chain-fatty-acid--CoA ligase, putative / long-chain acyl-CoA synthetase             | 3.6           | 2.3  | 4.81E-24   | 4.81E-24   | 1.18E-04   | 7.73E-04   |
| At5g62070.1 | calmodulin-binding family protein                                                        | 3.5           | 0.3  | 9.19E-14   | 4.20E-16   | 3.75E-16   | 1.36E-16   |
| At5g52310.1 | desiccation-responsive protein 29A (RD29A)                                               | 3.5           | 1.0  | 7.50E-13   | 1.15E-12   | 4.43E-21   | 9.06E-21   |
| At4g30650.1 | low temperature and salt responsive protein                                              | 3.4           | 0.7  | 1.38E-13   | 4.90E-13   | 4.73E-19   | 3.25E-17   |
| At5g52640.1 | heat shock protein 81-1 (HSP81-1) / heat shock protein 83 (HSP83)                        | 3.4           | 1.5  | 9.94E-22   | 8.19E-22   | 2.79E-10   | 5.10E-06   |
| At2g24600.1 | ankyrin repeat family protein                                                            | 3.4           | 1.4  | 9.43E-10   | 5.36E-09   | 1.19E-21   | 6.06E-21   |
| At3g52430.1 | phytoalexin-deficient 4 protein (PAD4)                                                   | 3.4           | 1.6  | 3.30E-22   | 1.40E-21   | 6.23E-08   | 6.12E-08   |
| At5g56010.1 | Heat shock protein 81-2 (HSP81-2)                                                        | 3.3           | 0.8  | 3.85E-19   | 4.10E-20   | 6.04E-12   | 9.94E-15   |
| At3g44870.1 | S-adenosyl-L-methionine:carboxyl methyltransferase family protein                        | 3.2           | 1.5  | 5.00E-22   | 6.07E-20   | 2.66E-08   | 2.60E-05   |
| At2g42530.1 | cold-responsive protein / cold-regulated protein (cor15b)                                | 3.2           | 1.2  | 4.81E-09   | 2.32E-09   | 3.41E-21   | 2.18E-19   |
| At4g38560.1 | expressed protein                                                                        | 3.1           | 1.2  | 7.62E-19   | 4.13E-20   | 1.66E-07   | 7.17E-06   |
| At2g41090.1 | calmodulin-like calcium-binding protein, 22 kDa (CaBP-22)                                | 3.0           | 1.7  | 6.54E-22   | 4.86E-20   | 7.58E-05   | 4.19E-04   |
| At3g12580.1 | heat shock protein 70, putative / HSP70                                                  | 3.0           | 0.8  | 6.35E-17   | 6.40E-18   | 2.65E-09   | 4.92E-08   |
| At5g23240.1 | DNAJ heat shock N-terminal domain-containing protein                                     | 3.0           | 0.9  | 2.36E-16   | 1.36E-18   | 1.23E-07   | 4.95E-07   |
| At5g25610.1 | dehydration-responsive protein (RD22)                                                    | 2.9           | 0.5  | 4.94E-11   | 1.59E-13   | 8.27E-16   | 1.14E-17   |
| At5g56030.1 | heat shock protein 81-2 (HSP81-2)                                                        | 2.9           | 0.6  | 9.45E-18   | 5.91E-17   | 6.34E-11   | 6.36E-11   |
| At1g45010.1 | expressed protein                                                                        | 2.8           | 0.2  | 3.79E-09   | 8.11E-04   | 1.90E-15   | 9.79E-13   |
| At1g56660.1 | expressed protein                                                                        | 2.8           | 1.2  | 4.37E-11   | 8.18E-11   | 1.27E-12   | 1.55E-11   |
| At4g18440.1 | adenylosuccinate lyase                                                                   | 2.8           | 0.7  | 6.29E-07   | 5.25E-13   | 3.61E-12   | 8.22E-16   |
| At1g59590.1 | expressed protein                                                                        | 2.8           | 1.0  | 5.83E-18   | 4.17E-19   | 3.76E-05   | 1.23E-04   |
| At2g29120.1 | glutamate receptor family protein (GLR2.7)                                               | 2.8           | 1.1  | 1.13E-18   | 2.90E-18   | 1.15E-06   | 1.93E-06   |
| At4g31500.1 | cytochrome P450 83B1 (CYP83B1)                                                           | 2.8           | 1.1  | 7.42E-20   | 1.68E-17   | 5.50E-08   | 3.10E-06   |
| At4g32650.1 | inward rectifying potassium channel, putative (KAT3)                                     | 2.8           | 1.4  | 4.29E-17   | 2.46E-20   | 8.32E-04   | 8.20E-04   |

Supplementary Table 2. The upregulated genes in the microarray analysis of 35S:RPK1 plants with fold change of &gt;2 (35SRPK1/wild-type control).

| Locus       | Gene name                                                                                                | Fold change*  |      | P value    |            |            |            |
|-------------|----------------------------------------------------------------------------------------------------------|---------------|------|------------|------------|------------|------------|
|             |                                                                                                          | Average Ratio | S.D. | lineL1 cy3 | lineL1 cy5 | lineL2 cy3 | lineL2 cy5 |
| At5g52320.1 | cytochrome P450, putative                                                                                | 2.7           | 0.1  | 2.33E-12   | 7.80E-13   | 2.42E-10   | 1.68E-09   |
| At4g33050.1 | calmodulin-binding family protein                                                                        | 2.6           | 0.6  | 5.92E-15   | 4.56E-17   | 5.89E-08   | 1.19E-10   |
| At1g66090.1 | disease resistance protein (TIR-NBS class)                                                               | 2.6           | 0.9  | 3.14E-17   | 1.83E-17   | 1.76E-06   | 5.33E-07   |
| At1g06000.1 | UDP-glucuronosyl/UDP-glucosyl transferase family protein                                                 | 2.6           | 0.7  | 3.05E-15   | 1.29E-14   | 6.24E-08   | 4.57E-05   |
| At1g72930.1 | Toll-Interleukin-Resistance (TIR) domain-containing protein                                              | 2.6           | 1.0  | 1.82E-15   | 5.34E-19   | 4.19E-05   | 9.82E-09   |
| At3g16460.1 | jacalin lectin family protein                                                                            | 2.6           | 0.6  | 2.90E-07   | 7.13E-08   | 8.64E-13   | 1.13E-12   |
| At4g12720.1 | MutT/nudix family protein                                                                                | 2.6           | 0.1  | 2.32E-12   | 2.89E-12   | 1.59E-13   | 2.29E-12   |
| At2g37710.1 | lectin protein kinase                                                                                    | 2.6           | 1.0  | 1.57E-17   | 1.57E-17   | 7.80E-06   | 7.03E-06   |
| At2g46430.1 | cyclic nucleotide-regulated ion channel                                                                  | 2.6           | 1.0  | 1.94E-18   | 1.94E-18   | 1.04E-07   | 1.21E-04   |
| At3g07390.1 | auxin-responsive protein / auxin-induced protein (AIR12)                                                 | 2.6           | 0.7  | 3.07E-16   | 3.07E-16   | 1.58E-08   | 2.57E-07   |
| At3g45860.1 | receptor-like protein kinase, putative similar to receptor-like protein kinase 4                         | 2.5           | 1.1  | 5.21E-18   | 5.21E-18   | 4.27E-04   | 4.56E-04   |
| At5g47910.1 | respiratory burst oxidase protein D (RbohD) / NADPH oxidase                                              | 2.5           | 0.5  | 3.28E-09   | 6.46E-09   | 5.16E-15   | 1.01E-12   |
| At5g44580.1 | expressed protein                                                                                        | 2.5           | 0.6  | 2.49E-11   | 7.94E-17   | 8.25E-07   | 4.53E-12   |
| At1g80840.1 | WRKY family transcription factor                                                                         | 2.5           | 0.6  | 3.16E-07   | 5.90E-08   | 7.56E-14   | 3.93E-13   |
| At5g27420.1 | zinc finger (C3HC4-type RING finger) family protein similar to RING-H2 zinc finger protein ATL6          | 2.5           | 0.6  | 2.54E-14   | 1.09E-15   | 2.05E-07   | 1.06E-07   |
| At5g15970.1 | stress-responsive protein (KIN2) / cold-responsive protein (COR6.6)                                      | 2.4           | 0.7  | 2.79E-06   | 2.16E-09   | 1.08E-12   | 6.29E-17   |
| At1g24140.1 | matrixin family protein similar to matrix metalloproteinase                                              | 2.4           | 0.8  | 1.25E-15   | 3.8E-16    | 9.93E-06   | 5.31E-05   |
| At4g34150.1 | C2 domain-containing protein similar to calcium-dependent protein kinase                                 | 2.4           | 0.2  | 5.05E-11   | 2.04E-09   | 9.17E-12   | 2.58E-13   |
| At1g70820.1 | phosphoglucosyltransferase, putative / glucose phosphomutase                                             | 2.4           | 0.5  | 4.13E-08   | 1.3E-07    | 1.26E-14   | 1.17E-13   |
| At1g20510.1 | 4-coumarate--CoA ligase family protein / 4-coumaroyl-CoA synthase family protein                         | 2.4           | 0.1  | 1.38E-11   | 4.86E-12   | 7.55E-11   | 4.03E-10   |
| At1g71880.1 | sucrose transporter / sucrose-proton symporter (SUC1)                                                    | 2.4           | 0.2  | 8.34E-13   | 2.1E-12    | 1.25E-09   | 2.57E-09   |
| At1g67330.1 | expressed protein                                                                                        | 2.3           | 0.5  | 4.34E-13   | 2.24E-13   | 1.19E-06   | 1.86E-05   |
| At3g55130.1 | ABC transporter family protein breast cancer resistance protein 1 BCRP1                                  | 2.3           | 0.3  | 1.46E-11   | 1.51E-10   | 1.3E-12    | 9.84E-08   |
| At1g22250.1 | expressed protein                                                                                        | 2.3           | 0.3  | 7.02E-06   | 5.59E-08   | 1.43E-08   | 1.48E-08   |
| At4g16860.1 | disease resistance protein (TIR-NBS-LRR class)                                                           | 2.3           | 0.1  | 2.19E-11   | 7.95E-10   | 3.37E-11   | 1.08E-09   |
| At3g55980.1 | zinc finger (CCCH-type) family protein                                                                   | 2.3           | 0.6  | 1.22E-06   | 1.07E-05   | 1.32E-14   | 1.39E-13   |
| At4g02330.1 | pectinesterase family protein                                                                            | 2.3           | 0.5  | 5.57E-13   | 9.03E-14   | 1.4E-06    | 9.42E-06   |
| At2g26190.1 | calmodulin-binding family protein                                                                        | 2.3           | 0.1  | 7.65E-11   | 9.23E-12   | 3.8E-09    | 9.02E-10   |
| At1g13080.1 | cytochrome P450 family protein                                                                           | 2.3           | 0.2  | 7.26E-10   | 9.02E-13   | 2.16E-09   | 3.35E-09   |
| At3g46600.1 | scarecrow transcription factor family protein scarecrow-like 11                                          | 2.2           | 0.1  | 7.89E-11   | 2.33E-09   | 3.91E-11   | 1.84E-09   |
| At4g39330.1 | mannitol dehydrogenase                                                                                   | 2.2           | 0.5  | 5.58E-06   | 1.65E-06   | 6.13E-14   | 1.23E-12   |
| At3g24500.1 | ethylene-responsive transcriptional coactivator                                                          | 2.2           | 0.7  | 1.01E-13   | 1.77E-14   | 5.52E-05   | 0.000147   |
| At5g01540.1 | lectin protein kinase, putative similar to receptor lectin kinase 3                                      | 2.2           | 0.5  | 9.48E-13   | 6.42E-13   | 5.74E-06   | 1.77E-06   |
| At5g54190.1 | protochlorophyllide reductase A, chloroplast / PCR A / NADPH-protochlorophyllide oxidoreductase A (PORA) | 2.2           | 0.1  | 6.68E-10   | 2.54E-09   | 1.43E-08   | 3.18E-07   |
| At5g13200.1 | GRAM domain-containing protein / ABA-responsive protein-related                                          | 2.2           | 0.4  | 3.04E-11   | 9.29E-13   | 1.03E-05   | 6.94E-08   |
| At4g38620.1 | myb family transcription factor (MYB4)                                                                   | 2.2           | 0.3  | 4.08E-12   | 1.3E-09    | 5.16E-10   | 3.71E-06   |
| At5g11790.1 | Ndr family protein                                                                                       | 2.2           | 0.2  | 1.81E-07   | 1.19E-08   | 6.41E-11   | 5.93E-09   |
| At1g68520.1 | zinc finger (B-box type) family protein                                                                  | 2.2           | 0.1  | 2.44E-08   | 9.86E-10   | 6.35E-11   | 5.81E-10   |

Supplementary Table 2. The upregulated genes in the microarray analysis of 35S:RPK1 plants with fold change of >2 (35SRPK1/wild-type control).

| Locus       | Gene name                                                              | Fold change*  |      | P value    |            |            |            |
|-------------|------------------------------------------------------------------------|---------------|------|------------|------------|------------|------------|
|             |                                                                        | Average Ratio | S.D. | lineL1 cy3 | lineL1 cy5 | lineL2 cy3 | lineL2 cy5 |
| At5g41750.1 | disease resistance protein (TIR-NBS-LRR class)                         | 2.2           | 0.3  | 2.59E-12   | 3.34E-09   | 3.65E-09   | 7.31E-06   |
| At3g52470.1 | harpin-induced family protein / HIN1 family protein                    | 2.2           | 0.3  | 7.38E-07   | 4.6E-12    | 1.67E-05   | 9.79E-08   |
| At2g30870.1 | glutathione S-transferase                                              | 2.1           | 0.3  | 2.54E-12   | 8.93E-11   | 5.5E-08    | 9.37E-07   |
| At3g50970.1 | dehydrin xero2 (XERO2) / low-temperature-induced protein LTI30 (LTI30) | 2.1           | 0.5  | 0.000518   | 1.85E-05   | 1.93E-09   | 3.93E-10   |
| At1g66920.1 | serine/threonine protein kinase                                        | 2.1           | 0.6  | 1.42E-12   | 7.76E-13   | 5.94E-06   | 0.000296   |
| At5g19240.1 | expressed protein                                                      | 2.1           | 0.5  | 1.93E-13   | 2.16E-11   | 2.72E-06   | 4.85E-05   |
| At1g01420.1 | UDP-glucuronosyl/UDP-glucosyl transferase family protein               | 2.1           | 0.3  | 1.04E-10   | 4.7E-07    | 1.11E-11   | 1.86E-06   |
| At2g41870.1 | remorin family protein                                                 | 2.1           | 0.5  | 3.61E-06   | 1.4E-05    | 1.33E-13   | 4.63E-10   |
| At5g56000.1 | heat shock protein 81-4 (HSP81-4) , hsp81.4 [Arabidopsis thaliana]     | 2.1           | 0.3  | 8.14E-11   | 1.47E-10   | 2.06E-07   | 1.13E-06   |
| At1g18570.1 | myb family transcription factor (MYB51)                                | 2.1           | 0.3  | 9.92E-10   | 2.62E-11   | 7.84E-06   | 3.2E-06    |
| At4g01250.1 | WRKY family transcription factor                                       | 2.1           | 0.5  | 1.15E-11   | 9.17E-13   | 0.000219   | 9.66E-06   |
| At3g13080.1 | ABC transporter family protein                                         | 2.1           | 0.5  | 1.53E-10   | 1.15E-12   | 0.000697   | 3.35E-05   |
| At5g49910.1 | heat shock protein 70 / HSP70 (HSC70-7)                                | 2.1           | 0.8  | 1.5E-09    | 1.29E-08   | 0.000675   | 0.0003     |
| At2g23340.1 | AP2 domain-containing transcription factor                             | 2.0           | 0.2  | 2.85E-08   | 3.21E-10   | 5.69E-08   | 1.34E-06   |
| At1g74940.1 | senescence-associated protein-related SAG102_                          | 2.0           | 0.2  | 1.14E-07   | 2.38E-07   | 6.85E-11   | 1.53E-08   |
| At4g30470.1 | cinnamoyl-CoA reductase-related protein                                | 2.0           | 0.1  | 6.49E-08   | 9.69E-08   | 6.77E-10   | 5.25E-08   |
| At1g80270.1 | DNA-binding protein                                                    | 2.0           | 0.4  | 0.000189   | 4.11E-06   | 2.4E-09    | 1.93E-10   |
| At3g04710.1 | ankyrin repeat family protein                                          | 2.0           | 0.1  | 3.87E-07   | 1.81E-06   | 1.99E-07   | 4.95E-06   |
| At1g55450.1 | embryo-abundant protein-related                                        | 2.0           | 0.3  | 5.06E-05   | 1.11E-07   | 1.72E-10   | 1.65E-10   |
| At4g31550.2 | WRKY family transcription factor                                       | 2.0           | 0.1  | 9.27E-08   | 2.31E-07   | 3.04E-09   | 6.73E-09   |

\*Fold change was defined as the fluorescence intensity (>1000) of each cDNA of 35S:RPK1/fluorescence intensity of each cDNA of the wild-type vector control line with P value <0.001.

Supplementary Table 3. The downregulated genes in the microarray analysis of 35S:RPK1 plants with fold change of &gt;3 (wild-type control/35SRPK1).

| Locus       | Gene name                                                                                                     | Fold change*  |      | P value    |            |            |            |
|-------------|---------------------------------------------------------------------------------------------------------------|---------------|------|------------|------------|------------|------------|
|             |                                                                                                               | Average Ratio | S.D. | lineL1 cy3 | lineL1 cy5 | lineL2 cy3 | lineL2 cy5 |
| At1g61390.1 | S-locus protein kinase, putative contains protein kinase domain                                               | 11.9          | 1.5  | 2.39E-30   | 9.93E-30   | 8.04E-30   | 1.83E-28   |
| At2g33380.1 | calcium-binding RD20 protein (RD20) induced by abscisic acid during dehydration                               | 8.3           | 0.4  | 1.92E-27   | 3.23E-27   | 1.28E-27   | 5.45E-28   |
| At5g61160.1 | malonyl CoA:anthocyanin 5-O-glucoside-6"-O-malonyltransferase from <i>Perilla frutescens</i>                  | 7.8           | 0.6  | 2.93E-22   | 2.43E-24   | 4.16E-22   | 6.77E-20   |
| At3g10320.1 | expressed protein                                                                                             | 7.5           | 6.5  | 1.90E-05   | 2.61E-07   | 1.94E-23   | 3.48E-22   |
| At3g61930.1 | expressed protein                                                                                             | 7.4           | 5.4  | 9.06E-15   | 1.87E-14   | 2.70E-24   | 1.15E-19   |
| At4g37430.1 | cytochrome P450 81F1 (CYP81F1) (CYP91A2)                                                                      | 6.4           | 3.7  | 6.23E-19   | 3.51E-16   | 1.32E-29   | 2.20E-26   |
| At5g44420.1 | plant defensin protein, putative (PDF1.2a) plant defensin protein family member                               | 5.9           | 1.7  | 1.75E-18   | 1.58E-19   | 2.78E-22   | 1.69E-19   |
| At1g74010.1 | strictosidine synthase family protein similar to strictosidine synthase [ <i>Rauvolfia serpentina</i> ]       | 5.6           | 4.8  | 7.29E-04   | 1.72E-04   | 1.41E-29   | 8.50E-28   |
| At3g60140.1 | glycosyl hydrolase family 1 protein contains                                                                  | 5.3           | 3.8  | 3.33E-06   | 2.12E-09   | 1.04E-24   | 1.48E-23   |
| At1g19050.1 | two-component responsive regulator / response regulator 7 (ARR7)                                              | 5.1           | 1.7  | 5.40E-25   | 4.15E-26   | 2.95E-18   | 1.71E-18   |
| At4g25480.1 | DRE-binding protein (DREB1A) / CRT/DRE-binding factor 3 (CBF3) identical to DREB1A                            | 4.9           | 0.9  | 6.40E-24   | 4.62E-22   | 8.98E-21   | 8.08E-18   |
| At1g05680.1 | UDP-glucuronosyl/UDP-glucosyl transferase family protein                                                      | 4.4           | 0.4  | 1.10E-18   | 9.43E-21   | 3.17E-21   | 1.08E-20   |
| At4g23750.1 | AP2 domain-containing transcription factor                                                                    | 4.3           | 2.5  | 5.54E-09   | 8.34E-09   | 3.78E-24   | 3.39E-21   |
| At2g14620.1 | xyloglucan:xyloglucosyl transferase                                                                           | 4.2           | 2.7  | 6.18E-04   | 8.62E-08   | 7.38E-14   | 2.77E-14   |
| At1g52400.1 | glycosyl hydrolase family 1 protein / beta-glucosidase, putative                                              | 4.2           | 0.9  | 5.46E-22   | 4.99E-21   | 9.62E-14   | 6.04E-21   |
| At1g17170.1 | glutathione S-transferase                                                                                     | 4.1           | 2.3  | 2.92E-24   | 1.69E-24   | 5.78E-08   | 3.81E-10   |
| At1g02640.1 | glycosyl hydrolase family 3 protein similar to beta-xylosidase                                                | 4.0           | 1.9  | 1.16E-11   | 2.94E-11   | 1.25E-24   | 7.42E-23   |
| At5g62920.1 | two-component responsive regulator / response regulator 6 (ARR6)                                              | 4.0           | 2.0  | 1.34E-22   | 1.44E-24   | 1.86E-09   | 4.98E-11   |
| At3g16670.1 | expressed protein                                                                                             | 3.9           | 0.5  | 6.07E-21   | 6.50E-20   | 1.58E-18   | 9.91E-17   |
| At4g26150.1 | zinc finger (GATA type) family protein                                                                        | 3.7           | 0.9  | 1.10E-13   | 1.18E-15   | 4.69E-20   | 2.08E-20   |
| At1g74890.1 | two-component responsive regulator / response regulator 15 (ARR15)                                            | 3.6           | 0.1  | 5.95E-19   | 7.07E-18   | 1.04E-18   | 1.09E-17   |
| At3g21150.1 | zinc finger (B-box type) family protein                                                                       | 3.6           | 0.1  | 6.90E-18   | 1.54E-18   | 8.91E-17   | 2.45E-17   |
| At5g49360.1 | glycosyl hydrolase family 3 protein                                                                           | 3.6           | 0.5  | 7.37E-19   | 2.01E-19   | 1.07E-15   | 3.03E-14   |
| At5g02760.1 | protein phosphatase 2C family protein / PP2C family protein similar to Ser/Thr protein phosphatase 2C (PP2C6) | 3.6           | 0.5  | 8.50E-19   | 7.68E-19   | 4.06E-15   | 9.68E-15   |
| At3g28740.1 | cytochrome P450 family protein                                                                                | 3.5           | 1.8  | 9.24E-21   | 4.47E-23   | 3.53E-07   | 5.83E-09   |
| At5g56870.1 | beta-galactosidase, putative / lactase                                                                        | 3.5           | 0.2  | 5.64E-15   | 5.30E-16   | 4.32E-16   | 4.50E-13   |
| At5g59220.1 | protein phosphatase 2C, putative / PP2C, putative ABA induced protein phosphatase 2C                          | 3.4           | 0.5  | 3.46E-15   | 1.86E-15   | 6.21E-19   | 1.20E-19   |
| At4g25470.1 | DRE-binding protein (DREB1C) / CRT/DRE-binding factor 2 (CBF2) identical to DREB1C                            | 3.4           | 0.4  | 5.94E-18   | 2.91E-19   | 3.09E-15   | 1.20E-15   |
| At5g40690.1 | expressed protein                                                                                             | 3.3           | 0.5  | 2.24E-17   | 2.90E-19   | 2.41E-13   | 1.21E-14   |
| At4g36850.1 | PQ-loop repeat family protein / transmembrane family protein                                                  | 3.3           | 1.9  | 3.57E-04   | 1.23E-06   | 4.26E-19   | 2.73E-18   |
| At1g52890.1 | no apical meristem (NAM) family protein                                                                       | 3.2           | 0.7  | 2.31E-13   | 3.37E-13   | 7.56E-20   | 5.78E-18   |
| At3g05730.1 | expressed protein                                                                                             | 3.2           | 1.1  | 2.25E-09   | 2.92E-10   | 5.02E-20   | 1.00E-19   |
| At2g29490.1 | glutathione S-transferase, putative similar to glutathione S-transferase 103-1A                               | 3.2           | 1.1  | 2.93E-09   | 1.51E-11   | 5.09E-20   | 2.67E-16   |
| At5g13180.1 | no apical meristem (NAM) family protein : hypothetical protein SENU5                                          | 3.2           | 0.9  | 1.65E-14   | 6.43E-10   | 2.53E-20   | 9.31E-16   |
| At4g08290.1 | nodulin MtN21 family protein                                                                                  | 3.1           | 0.0  | 4.82E-15   | 3.97E-15   | 4.74E-15   | 5.59E-15   |
| At4g28040.1 | nodulin MtN21 family protein                                                                                  | 3.1           | 0.9  | 1.42E-18   | 9.60E-20   | 4.84E-10   | 1.49E-10   |
| At5g60890.1 | receptor-like protein kinase (ATR1); identical to cDNA putative transcription factor (MYB34)                  | 3.0           | 0.4  | 1.49E-12   | 6.18E-14   | 2.89E-17   | 1.79E-17   |
| At1g69570.1 | Dof-type zinc finger domain-containing protein nearly identical to H-protein promoter binding factor-2b       | 3.0           | 0.4  | 1.10E-16   | 1.51E-17   | 7.82E-13   | 1.17E-13   |
| At1g17020.1 | oxidoreductase, 2OG-Fe(II) oxygenase family protein similar to flavonol synthase                              | 3.0           | 0.2  | 7.64E-14   | 8.21E-16   | 2.36E-14   | 2.07E-15   |

\*Fold change was defined as the fluorescence intensity (&gt;1000) of each cDNA of the wild-type vector control /fluorescence intensity of each cDNA of 35S:RPK1 line with P value &lt;0.001.
